# Supplementary material
Source: publisher figshare collection journal article supplement (https://sage.figshare.com/ndownloader/files/17855456)
Supplement: Supplementary file 1 [file 17855456]

## Supplementary materials

Table S1. Relationship of LncRNA LSINCT5 expression and clinical variables among 30 pancreatic cancer patients.

| Parameters          | Number (n=30) | LncRNA LSINCT5 expression |     | P value |
|---------------------|---------------|---------------------------|-----|---------|
|                     |               | High                      | Low |         |
| Age (years)         |               |                           |     |         |
| ≤50                 | 7             | 5                         | 2   | 0.061   |
| >50                 | 23            | 10                        | 13  |         |
| Menstruation        |               |                           |     |         |
| non-menopause       | 10            | 7                         | 3   | 0.331   |
| menopause           | 20            | 9                         | 11  |         |
| FIGO stage          |               |                           |     |         |
| I-II                | 22            | 8                         | 14  | 0.012*  |
| III-IV              | 8             | 6                         | 2   |         |
| Histological grade  |               |                           |     |         |
| G1                  | 12            | 3                         | 9   | 0.022*  |
| G2+G3               | 18            | 12                        | 6   |         |
| Myometrial invasion |               |                           |     |         |
| <1/2                | 6             | 1                         | 5   | 0.045*  |
| ≥1/2                | 24            | 15                        | 9   |         |
| Lymphatic           |               |                           |     |         |
| Yes                 | 7             | 6                         | 1   | 0.024*  |
| No                  | 23            | 9                         | 14  |         |

\*P<0.5, the difference is significant

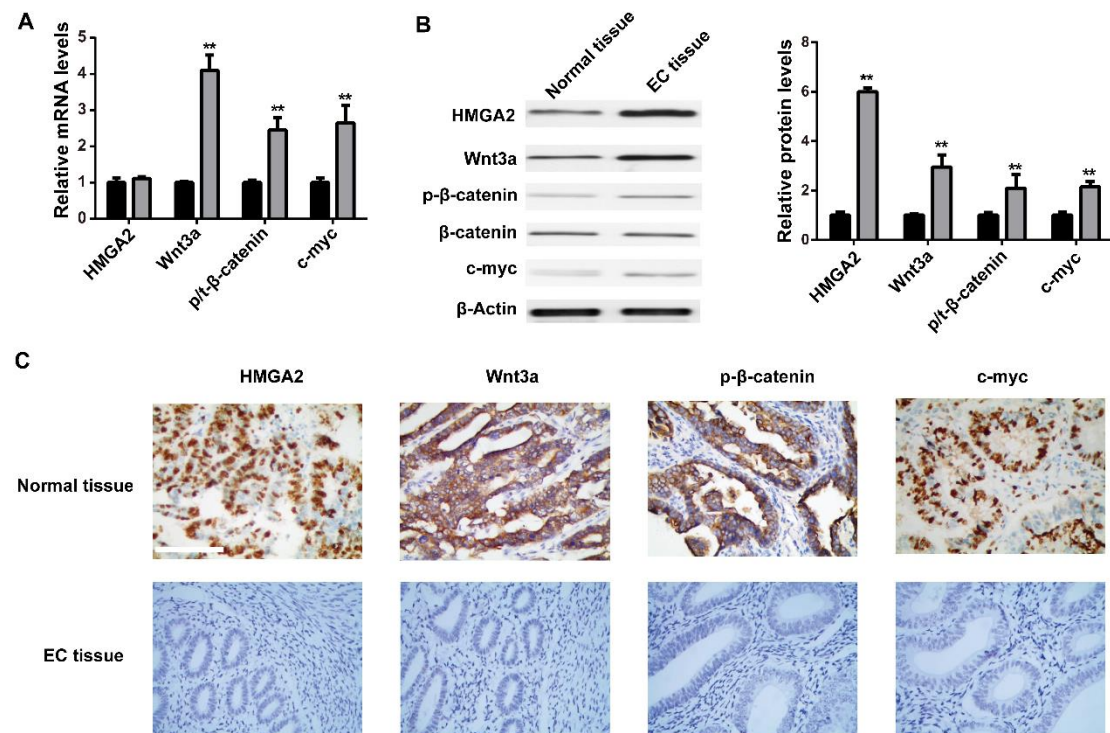

Figure S1. Relative expression of HMGA2, wnt3a, p-β-catenin and c-myc in EC tissues.

(A) The expression levels of HMGA2, wnt3a, p-β-catenin and c-myc in type 1 EC tissues and normal endometrium tissues were detected by RT-qPCR (A), western blot (B) and immunohistochemistry staining (C). The scale bar represents 100 μm, \*\*p<0.01, compared with normal tissue group.
